# Supplementary material for: The synergy of dietary supplements Lactobacillus salivarius LI01 and Bifidobacterium longum TC01 in alleviating liver failure in rats treated with d-galactosamine
Source: Royal Society of Chemistry journal article supplement (doi:10.1039/d1fo01807h), 2021-01-01
Supplement: d1fo01807h1.pdf [file d1fo01807h1.pdf]

## Supporting information

### **“Dietary supplements *Lactobacillus Salivarius* LI01 synergize with *Bifidobacterium Longum* TC01 in alleviating liver failure in rats treated with D-galactosamine”**

Aoxiang Zhuge<sup>a,b,†</sup>, Shengjie Li<sup>a,b,†</sup>, Yin Yuan<sup>a,b,†</sup>, Bo Li, Lanjuan Li<sup>a,b,\*</sup>

<sup>a</sup> State Key Laboratory for Diagnosis, National Clinical Research Center for Infectious Diseases, The First Affiliated Hospital, School of Medicine, Zhejiang University, Hangzhou, China

<sup>b</sup> Collaborative Innovation Center for Diagnosis and Treatment of Infectious Diseases, Hangzhou, China

<sup>†</sup> These authors contributed equally to this work.

\* Corresponding author

E-mail: ljli@zju.edu.cn

Tel: 86-571-87236421

Fax: 86-571-87236421

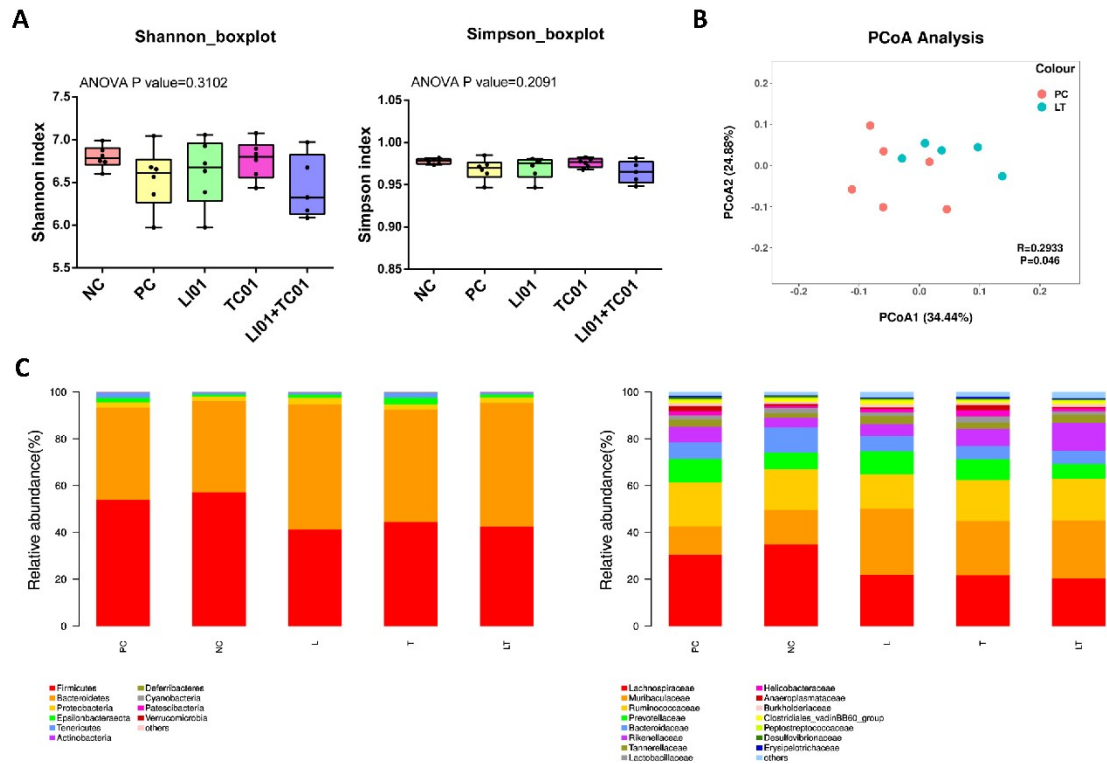

**ESI Fig. 1** Coadministration of LI01 and TC01 altered gut microbial community at multiple biological levels in D-GaIN-induced liver injury. (A) Shannon, Simpson index among experimental groups. (B) PCoA analysis between the PC and LI01+TC01 group. (C) Relative abundances of taxa among experimental groups at the phylum and family levels.

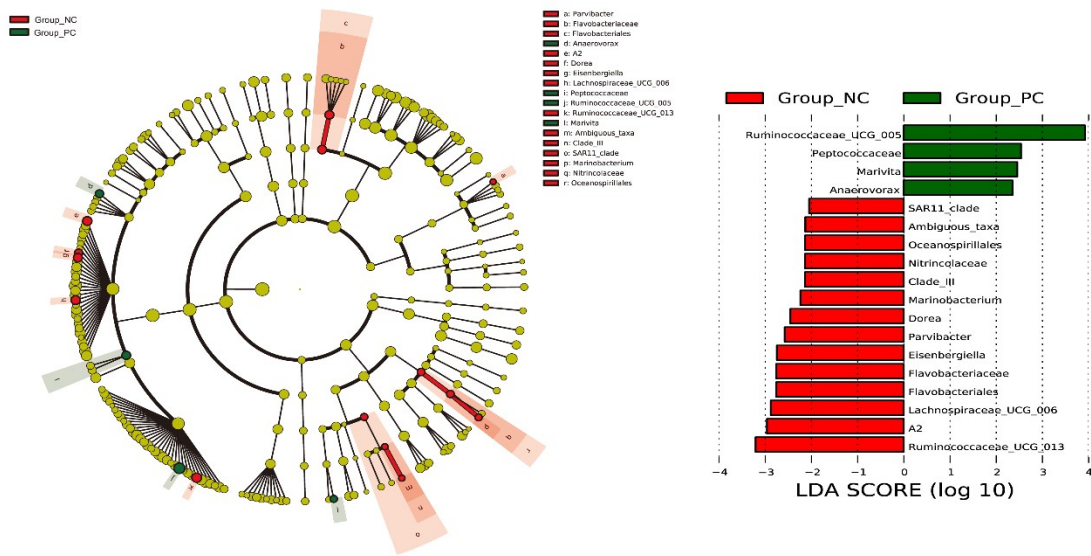

**ESI Fig. 2** D-GaIN-induced liver injury altered specific taxa in gut microbiota. LefSe analysis between the NC group and PC group. Green indicates higher abundance of taxa in the PC group while red presents more enrichment in the NC group. Rings from the inside out represents phylum to genus levels, and sizes of circles indicate relative abundance of the taxon. Only the taxa whose LDA score  $> 2$  is displayed.

**ESI Table 1** Primer pairs for Real-time Quantitative PCR analysis.

| <b>Gene</b>   | <b>Forward sequence (5'-3')</b> | <b>Reverse sequence (3'-5')</b> |
|---------------|---------------------------------|---------------------------------|
| GADPH         | GGCACAGTCAAGGCTGAGAATG          | ATGGTGGTGAAGACGCCAGTA           |
| TNF- $\alpha$ | CAGGTTCCGTCCCTCTCATA            | TGCCAGTTCCACATCTCG              |
| IL-10         | GAAGCTGAAGACCCTCTGGA            | TGGCCTTGTAGACACCTTTG            |
| MCP-1         | CTATGCAGGTCTCTGTCACGCTTC        | CAGCCGACTCATTGGGATCA            |
| M-CSF         | CGAGGTGTCGGAGCACTGTA            | CGATCAACTGCTGCAAAATCTG          |
| TJP-1         | TGAGAAGCAGACACCCACTC            | AGCCCTGTATTCCGTCTCCT            |

GADPH was used as internal control.
